# Supplementary material for: Carbonized Lysine-Nanogels Protect against Infectious Bronchitis Virus
Source: MDPI journal article supplement (doi:10.3390/ijms22115415), 2021-05-21
Supplement: s1 [file s1]

## **Materials and Methods**

**Materials.** Lysine monohydrochloride, hydrochloric acid (HCl), sodium chloride (NaCl), potassium chloride (KCl), magnesium chloride (MgCl<sub>2</sub>), calcium chloride (CaCl<sub>2</sub>), and tris(hydroxymethyl)aminomethane (Tris) were purchased from Sigma-Aldrich (St. Louis, MO, USA). Phosphoric acid and acetic acid were purchased from Mallinckrodt Baker (Phillipsburg, NJ, USA). All the chemicals were used without modification. Phosphate buffered saline (PBS; containing 137 mM NaCl, 2.7 mM KCl, 10 mM Na<sub>2</sub>HPO<sub>4</sub>, and 1.8 mM KH<sub>2</sub>PO<sub>4</sub>; pH 7.4) was used to mimic physiological conditions. Milli-Q ultrapure water (18.2 MΩ·cm; EMD Millipore, Billerica, MA, USA) was used in all experiments.

**Cells and viruses.** BHK-21 cells (BCRC#60041) and Vero cells (BCRC#60013) were purchased from the Bioresource Collection and Research Center, Taiwan. Both cells were cultured with Eagle's Minimum Essential Medium (MEM, Gibco, NY, USA) supplemented with 10% fetal bovine serum (FBS, Gibco, NY, USA), at 37 °C in an atmosphere of 5% CO<sub>2</sub>. The BEFV (Tn88128 strain), PRV (PRV-TNL strain), and IBV (M41 strain) were provided by Dr. C.-Y. Chu (National Pingtung University of Science and Technology, Taiwan). The BEFV and PRV were cultured in BHK-21 and Vero cells respectively. The IBV was cultured in specific pathogen-free (SPF) chicken embryos (Animal Health Research Institute, COA, Taiwan) at 37 °C, relative humidity of 40–70%.

**Table S1.** Product yield, polydispersity index, hydrodynamic diameter, zeta potential, and fluorescence quantum yield (QY) of the as-prepared products from lysine hydrochloride by dry heating.

|          | Product yield (%) <sup>a</sup> | PDI <sup>b</sup> | Hydrodynamic diameter (nm; <i>n</i> =5) | Zeta potential (mV; <i>n</i> =5) | Fluorescence QY (%) <sup>c</sup> |
|----------|--------------------------------|------------------|-----------------------------------------|----------------------------------|----------------------------------|
| CNGs-180 | 96.5                           | 0.72             | 506.2 ± 246.6                           | 10.3 ± 3.4                       | 4.1                              |
| CNGs-210 | 89.5                           | 0.51             | 313.5 ± 85.6                            | 11.2 ± 3.9                       | 9.8                              |
| CNGs-240 | 80.4                           | 0.45             | 156.8 ± 43.2                            | 20.1 ± 1.9                       | 16.1                             |
| CNGs-270 | 61.5                           | 0.43             | 122.6 ± 29.9                            | 24.9 ± 1.4                       | 9.9                              |
| CNGs-300 | 20.5                           | 0.49             | 278.6 ± 35.5                            | 18.9 ± 3.3                       | 17.3                             |

<sup>a</sup> determined after the purification process by centrifugation of as-prepared products.

<sup>b</sup> polydispersity index (PDI).

<sup>c</sup> compared to quinine sulfate (QY: 54% in 0.1 M H<sub>2</sub>SO<sub>4</sub>).

**Table S2.** Elemental compositions of lysine and the CNGs were obtained by dry heating of lysine hydrochloride at 180, 210, 240, 270, and 300 °C for 2 h.

|                                   | Elemental compositions (wt%) <sup>a</sup> |       |       |       |                     |
|-----------------------------------|-------------------------------------------|-------|-------|-------|---------------------|
|                                   | C (%)                                     | H (%) | O (%) | N (%) | Cl (%) <sup>b</sup> |
| Lysine hydrochloride <sup>c</sup> | 38.5                                      | 8.4   | 18.4  | 15.3  | 19.5                |
| CNGs-180                          | 40.1                                      | 7.2   | 23.7  | 13.7  | 15.3                |
| CNGs-210                          | 40.5                                      | 8.9   | 20.3  | 14.3  | 16.0                |
| CNGs-240                          | 42.3                                      | 7.4   | 15.2  | 16.0  | 19.1                |
| CNGs-270                          | 45.5                                      | 8.2   | 9.3   | 16.6  | 20.4                |
| CNGs-300                          | 60.3                                      | 7.4   | 14.0  | 11.0  | 7.3                 |

<sup>a</sup> determined by elemental analysis.

<sup>b</sup> determined by ICP-MS.

<sup>c</sup> theoretical value of lysine hydrochloride (C<sub>6</sub>H<sub>15</sub>ClN<sub>2</sub>O<sub>2</sub>): C (39.5%), H (8.2%), O (17.6%), N (15.4%), and Cl (19.3%).

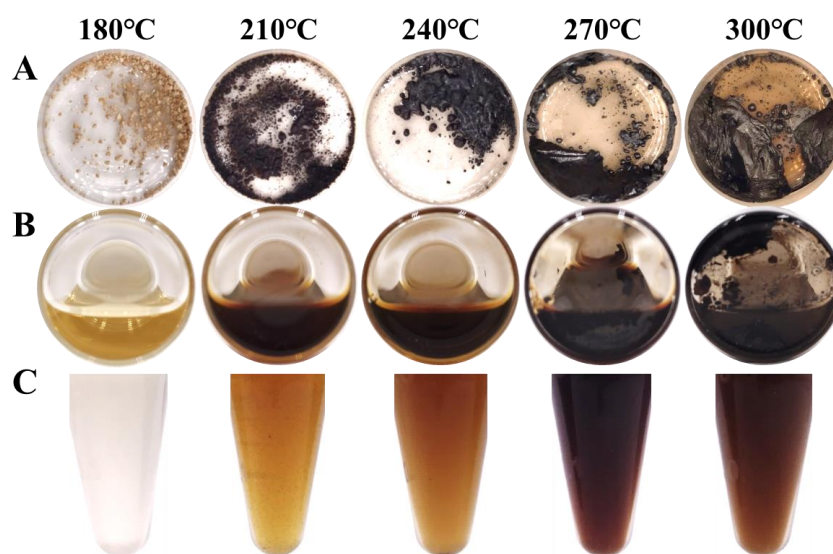

**Figure S1.** Photographs of the as-obtained CNGs. (A) Dry heating (180–300 °C) of lysine hydrochloride for 2 h, (B) dispersion of the obtained residue in deionized water by sonication for 3 h, and (C) purified CNGs dispersed in deionized water. The CNGs were purified by centrifugation with a relative centrifugation force (RCF) of 5,000 g for 60 min to remove aggregated nanoparticles.

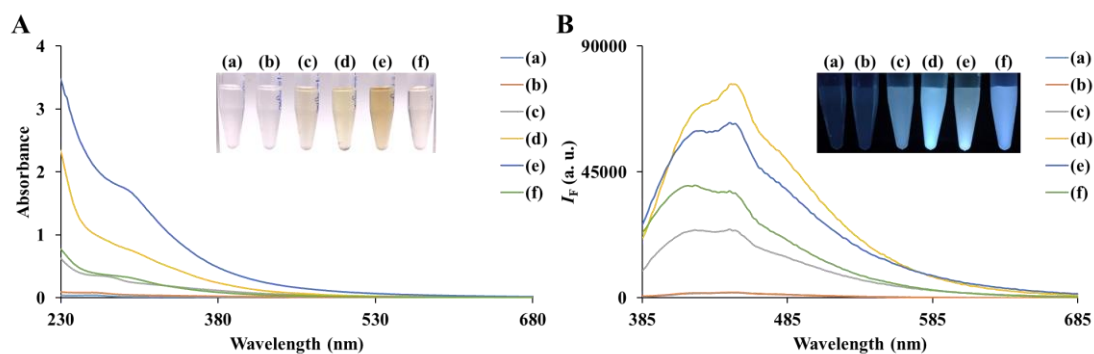

**Figure S2.** (A) UV-vis absorption and (B) fluorescence spectra of CNGs. (a) lysine hydrochloride without heating, (b) CNGs-180, (c) CNGs-210, (d) CNGs-240, (e) CNGs-270, and (f) CNGs-300. All purified samples were 20-fold diluted in 5 mM sodium phosphate buffer (pH 7.4) for measurements. Insets to (A) and (B) are the photographs of the corresponding solutions after 10-fold dilution under visible light and excitation with a UV light of 365 nm. Fluorescence spectra of all samples were recorded at an excitation wavelength of 365 nm. The fluorescence ( $I_F$ ) intensities are plotted in arbitrary units (a. u.).

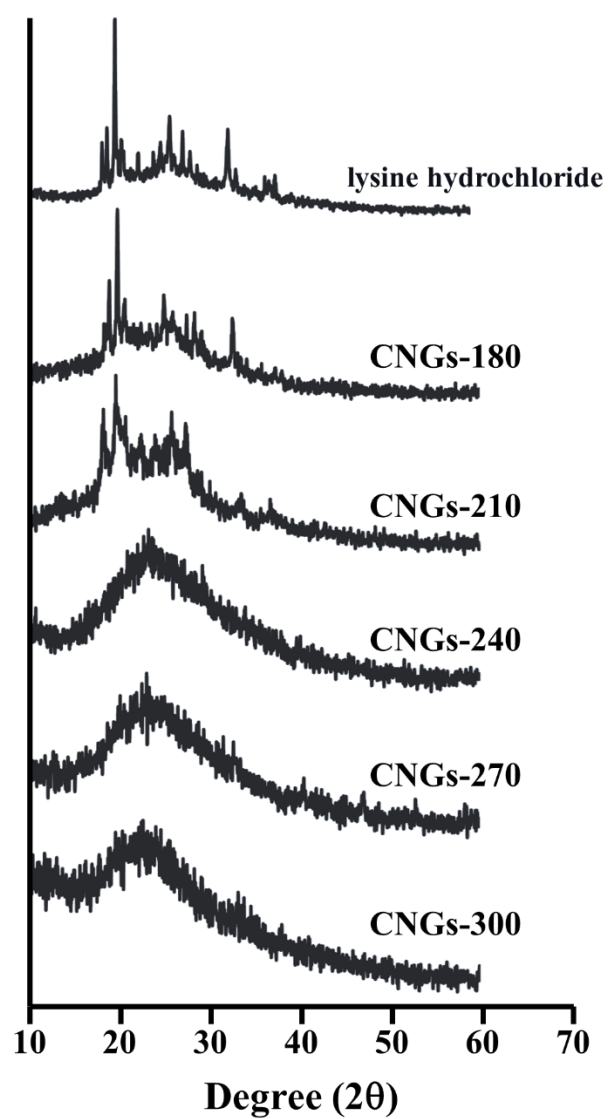

**Figures S3.** XRD spectra of lysine hydrochloride and CNGs synthesized at 180–300 °C.

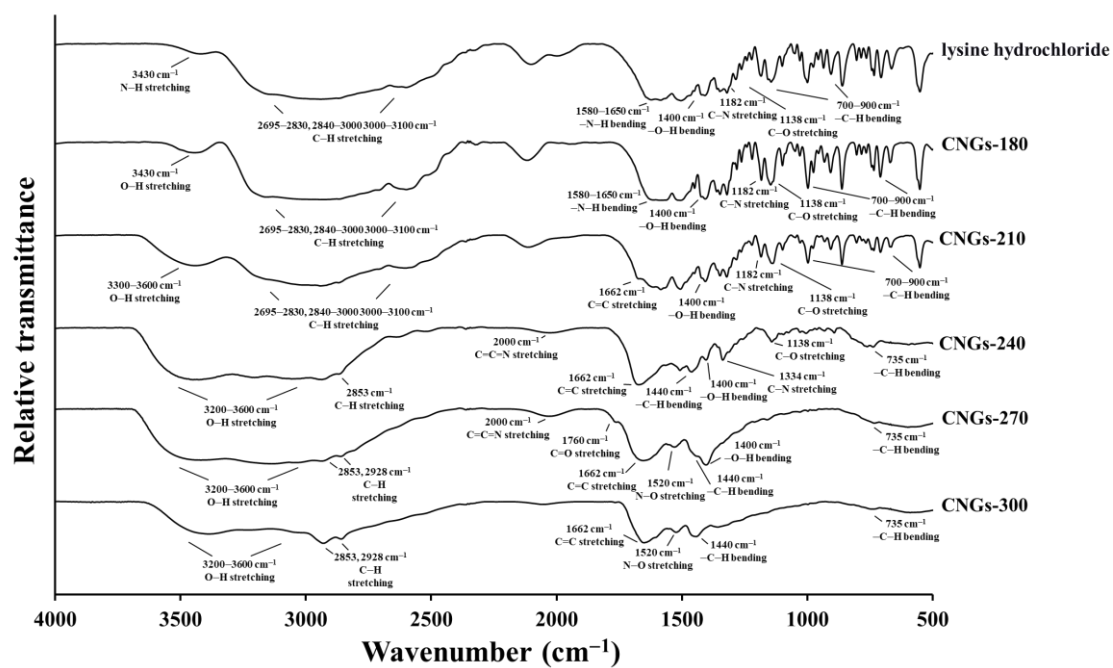

**Figures S4.** FT-IR spectra of lysine hydrochloride and CNGs synthesized at 180–300 °C.

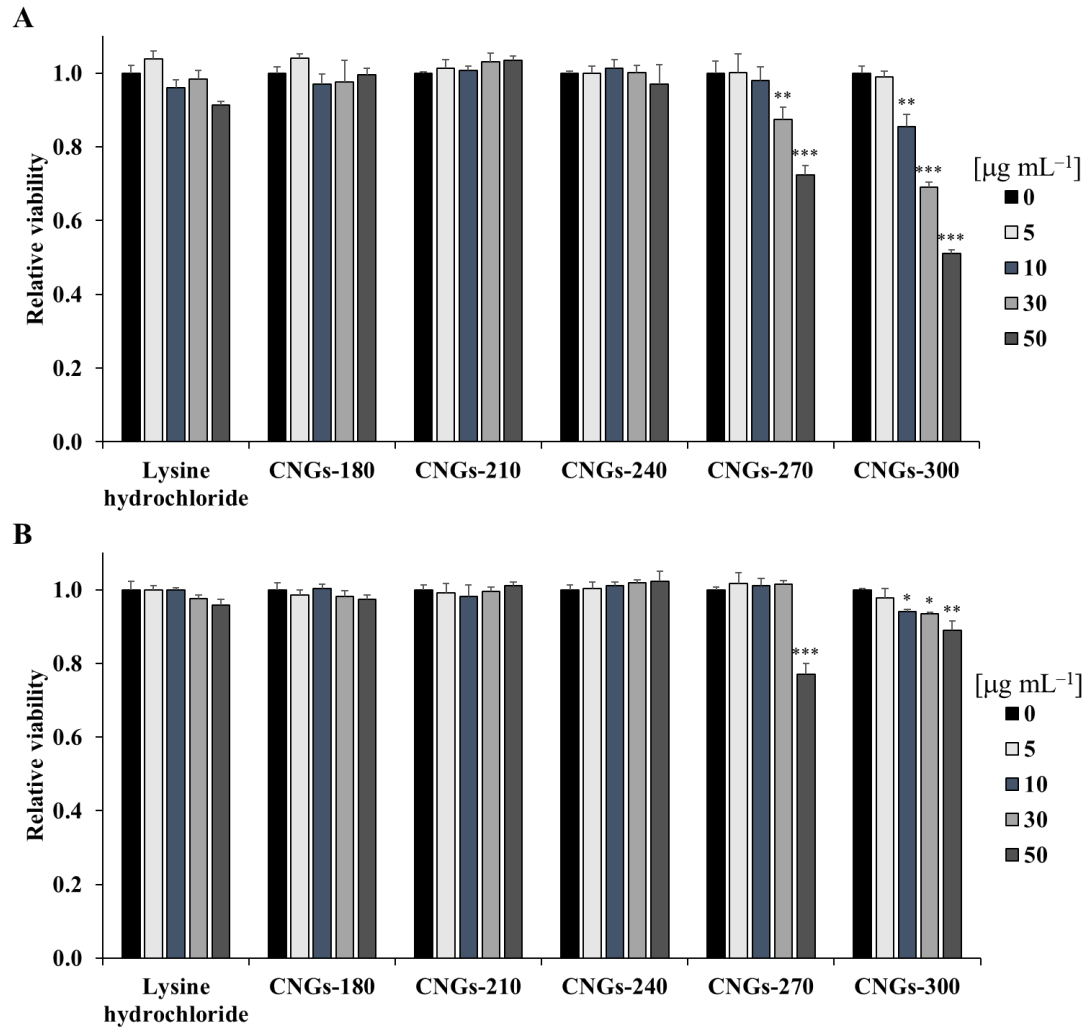

**Figures S5.** Relative cell viability of (A) BHK-21 cells and (B) Vero cells treated with lysine hydrochloride or CNGs with the concentration of 5 to 50  $\mu\text{g mL}^{-1}$  in media for 30 min followed by replacing the CNGs with fresh media and cultured for 72 h. Error bars represent the standard deviation of four separate experiments. (\* $p < 0.05$ , \*\* $p < 0.01$ , \*\*\* $p < 0.001$  versus cell control).



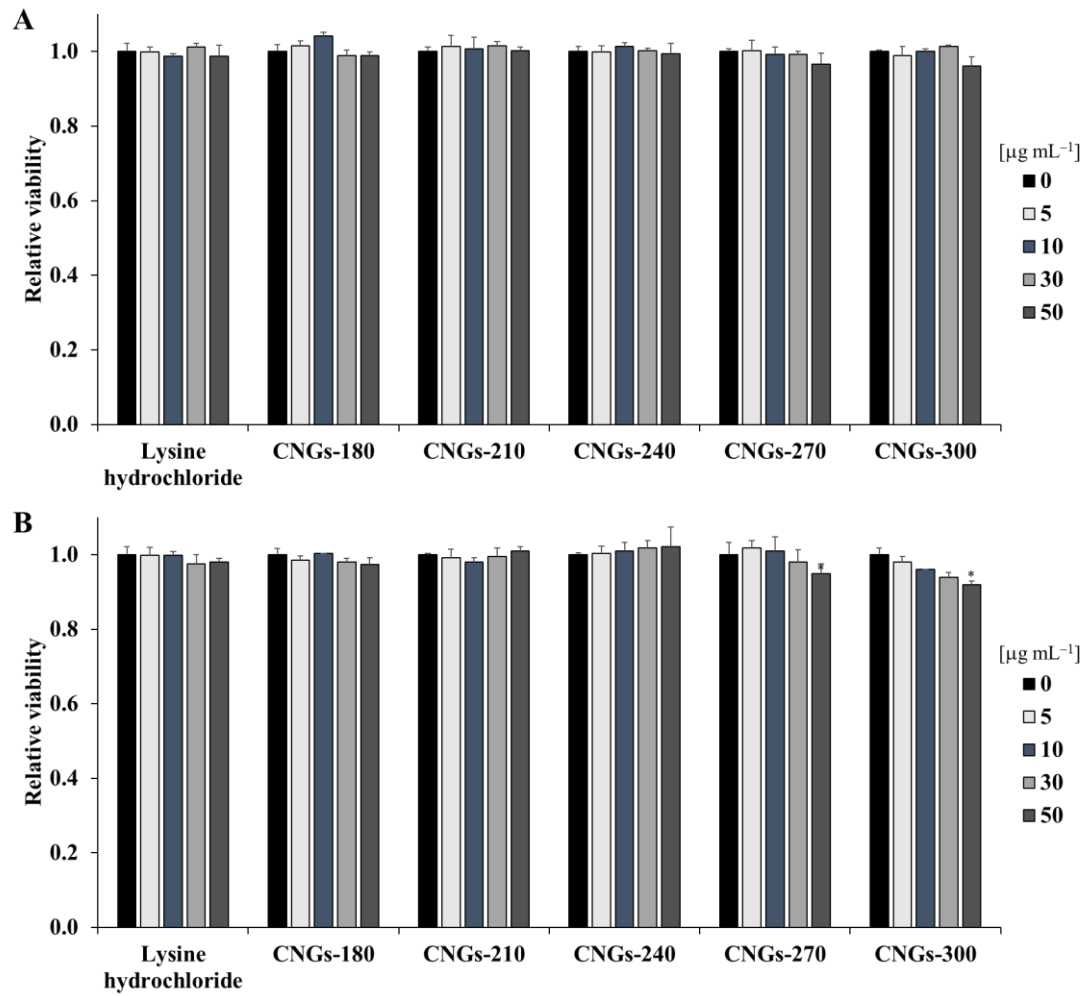

**Figure S6.** Relative cell viability of (A) BHK-21 cells and (B) Vero cells treated with lysine hydrochloride or CNGs with the concentration of 5–50  $\mu\text{g mL}^{-1}$  in media for 24 h. Error bars represent the standard deviation of four separate experiments. (\* $p < 0.05$ , versus cell control).

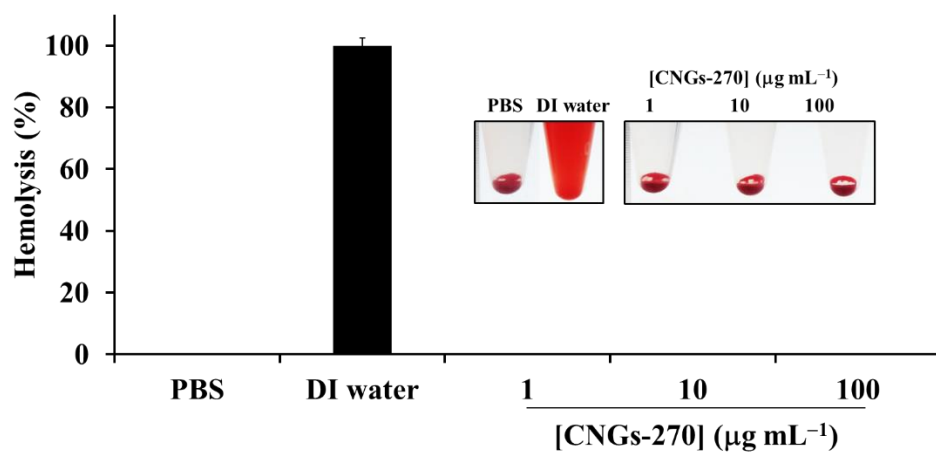

**Figure S7.** Hemolytic activities of CNGs-270 (1–100  $\mu\text{g mL}^{-1}$ ) on RBCs. Hemolysis assay with PBS and DI water was used as a negative control and positive control, respectively. Error bars represent the standard deviation from three separate experiments.

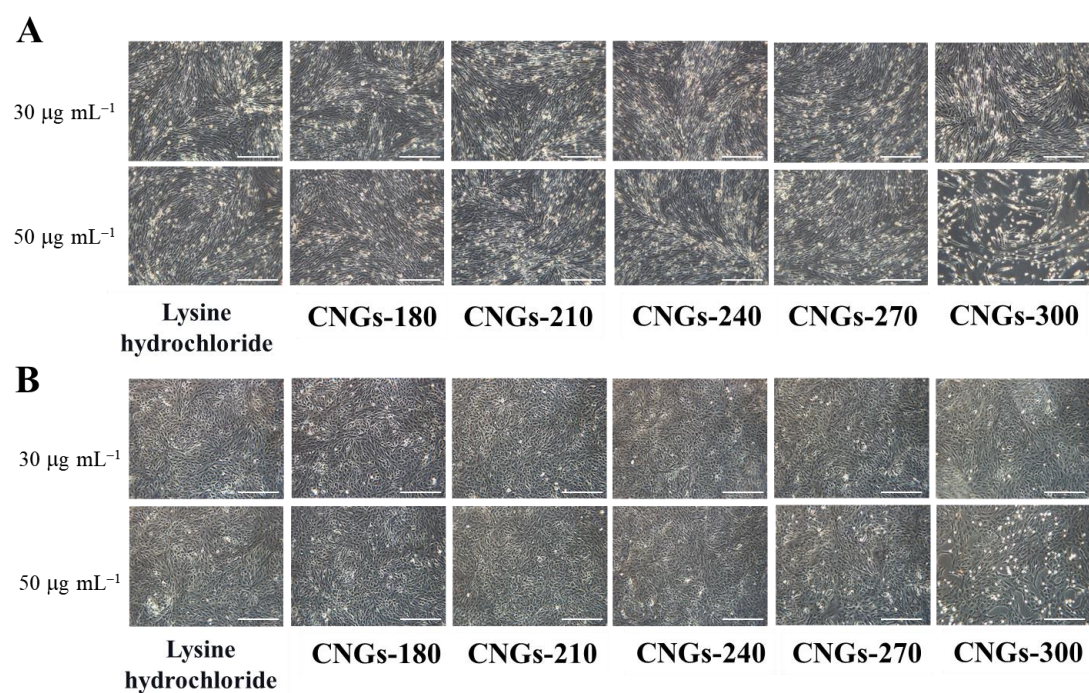

**Figure S8.** Microscopic images of (A) BHK-21 cells and (B) Vero cells treated with lysine hydrochloride or CNGs with a concentration of 30 or 50  $\mu\text{g mL}^{-1}$ , followed by replacing fresh medium and cultured for 72 h. The scale bar in the images is 500  $\mu\text{m}$ .

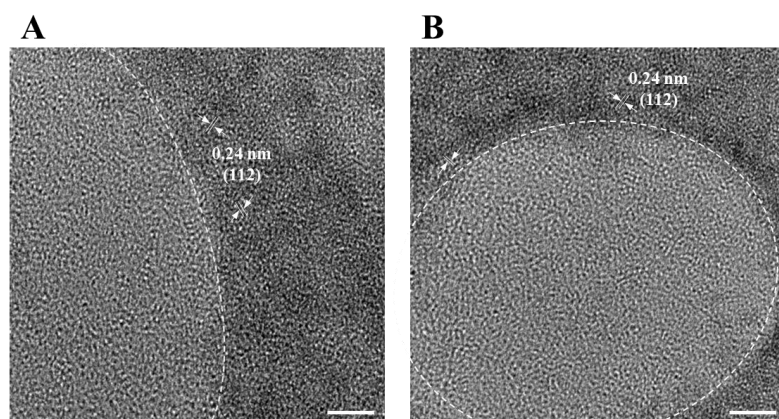

**Figure S9.** HRTEM images of (A) BEFV ( $5 \times 10^{5.5}$  TCID<sub>50</sub> mL<sup>-1</sup>) and (B) PRV ( $5 \times 10^{5.5}$  TCID<sub>50</sub> mL<sup>-1</sup>) after incubation with CNGs-270 (1.0  $\mu$ g mL<sup>-1</sup>) for 30 min in PBS. The circle region is the virus particle. The scale bar in the HRTEM images is 5 nm.
